# Supplementary material
Source: Research Square preprint supplement (doi:10.21203/rs.3.rs-8895104/v1)
Supplement: Supplementary file 1 [file 2c3df1235651f4aefc0c561e.xlsx]

## Sheet: Supplementary Table 1
Drug	MolId	MolName	Symbol
Chishao	MOL001002	ellagic acid	RELA
Chishao	MOL001002	ellagic acid	VEGFA
Chishao	MOL001002	ellagic acid	CDKN1A
Chishao	MOL001002	ellagic acid	MMP2
Chishao	MOL001002	ellagic acid	MMP9
Chishao	MOL001002	ellagic acid	NFKBIA
Chishao	MOL001002	ellagic acid	CXCL8
Chishao	MOL001002	ellagic acid	PRKCB
Chishao	MOL001002	ellagic acid	GSTP1
Chishao	MOL001002	ellagic acid	IGF2
Chishao	MOL001002	ellagic acid	GSTM1
Chishao	MOL001002	ellagic acid	GSTM2
Chishao	MOL001002	ellagic acid	GSTA1
Chishao	MOL001002	ellagic acid	GSTA2
Chishao	MOL001924	paeoniflorin	TNFAIP6
Chishao	MOL001924	paeoniflorin	IL6R
Chishao	MOL001924	paeoniflorin	CD14
Chishao	MOL001924	paeoniflorin	LBP
Chishao	MOL002714	baicalein	RELA
Chishao	MOL002714	baicalein	AKT1
Chishao	MOL002714	baicalein	VEGFA
Chishao	MOL002714	baicalein	BCL2
Chishao	MOL002714	baicalein	FOS
Chishao	MOL002714	baicalein	BAX
Chishao	MOL002714	baicalein	MMP9
Chishao	MOL002714	baicalein	CASP3
Chishao	MOL002714	baicalein	TP53
Chishao	MOL002714	baicalein	HIF1A
Chishao	MOL002714	baicalein	FOSL1
Chishao	MOL002714	baicalein	FOSL2
Chishao	MOL002714	baicalein	CDK1
Chishao	MOL002714	baicalein	CCNB1
Chishao	MOL002714	baicalein	MPO
Chishao	MOL002714	baicalein	AHR
Chishao	MOL002714	baicalein	IGF2
Chishao	MOL002714	baicalein	CYCS
Chishao	MOL002714	baicalein	NFATC1
Chishao	MOL002714	baicalein	TDRD7
Chishao	MOL002714	baicalein	EGLN1
Chishao	MOL002714	baicalein	NOX5
Chishao	MOL002714	baicalein	FABP5
Chishao	MOL002714	baicalein	APOD
Chishao	MOL000358	beta-sitosterol	BCL2
Chishao	MOL000358	beta-sitosterol	BAX
Chishao	MOL000358	beta-sitosterol	CASP9
Chishao	MOL000358	beta-sitosterol	JUN
Chishao	MOL000358	beta-sitosterol	CASP3
Chishao	MOL000358	beta-sitosterol	CASP8
Chishao	MOL000358	beta-sitosterol	PRKCA
Chishao	MOL000358	beta-sitosterol	PON1
Chishao	MOL000358	beta-sitosterol	MAP2
Chishao	MOL000492	(+)-catechin	CAT
Chishao	MOL000492	(+)-catechin	HAS2
Chishao	MOL000492	(+)-catechin	HSP90AB1
Chishao	MOL000358	beta-sitosterol	HSP90AB1
Chishao	MOL002714	baicalein	HSP90AB1
Chishao	MOL000449	Stigmasterol	MAOA
Chishao	MOL006992	(2R,3R)-4-methoxyl-distylin	HSP90AB1
Chishao	MOL000449	Stigmasterol	MAOB
Chishao	MOL006992	(2R,3R)-4-methoxyl-distylin	ESR1
Chishao	MOL000449	Stigmasterol	PTGS2
Chishao	MOL000492	(+)-catechin	ESR1
Chishao	MOL000358	beta-sitosterol	PTGS2
Chishao	MOL002714	baicalein	PTGS2
Chishao	MOL000449	Stigmasterol	NR3C2
Chishao	MOL000359	sitosterol	NR3C2
Chishao	MOL004355	Spinasterol	NR3C2
Chishao	MOL006992	(2R,3R)-4-methoxyl-distylin	PTGS2
Chishao	MOL000492	(+)-catechin	PTGS2
Chishao	MOL000449	Stigmasterol	PTGS1
Chishao	MOL000358	beta-sitosterol	KCNH2
Chishao	MOL001002	ellagic acid	HSP90AB1
Chishao	MOL000449	Stigmasterol	CHRM1
Chishao	MOL000449	Stigmasterol	LTA4H
Chishao	MOL000449	Stigmasterol	ADH1C
Chishao	MOL000449	Stigmasterol	AKR1B1
Chishao	MOL000449	Stigmasterol	CHRM2
Chishao	MOL004355	Spinasterol	PGR
Chishao	MOL002714	baicalein	PTGS1
Chishao	MOL000449	Stigmasterol	PGR
Chishao	MOL000358	beta-sitosterol	CHRM2
Chishao	MOL000449	Stigmasterol	CHRM3
Chishao	MOL000449	Stigmasterol	RXRA
Chishao	MOL000358	beta-sitosterol	PGR
Chishao	MOL006999	stigmast-7-en-3-ol	PGR
Chishao	MOL000358	beta-sitosterol	PTGS1
Chishao	MOL005043	campest-5-en-3beta-ol	PGR
Chishao	MOL000449	Stigmasterol	NCOA1
Chishao	MOL006992	(2R,3R)-4-methoxyl-distylin	PTGS1
Chishao	MOL000359	sitosterol	PGR
Chishao	MOL002714	baicalein	PRSS1
Chishao	MOL001002	ellagic acid	ESR1
Chishao	MOL000358	beta-sitosterol	GABRA1
Chishao	MOL000358	beta-sitosterol	CHRM1
Chishao	MOL000449	Stigmasterol	PLAU
Chishao	MOL000358	beta-sitosterol	CHRM4
Chishao	MOL000492	(+)-catechin	RXRA
Chishao	MOL000358	beta-sitosterol	CHRM3
Chishao	MOL000449	Stigmasterol	ADRA1B
Chishao	MOL000449	Stigmasterol	GABRA1
Chishao	MOL006992	(2R,3R)-4-methoxyl-distylin	NOS2
Chishao	MOL001002	ellagic acid	AR
Chishao	MOL000358	beta-sitosterol	SLC6A4
Chishao	MOL000449	Stigmasterol	IGHG1
Chishao	MOL000358	beta-sitosterol	ADRB2
Chishao	MOL001002	ellagic acid	PGR
Chishao	MOL000492	(+)-catechin	PTGS1
Chishao	MOL001918	paeoniflorgenone	GABRA1
Chishao	MOL002714	baicalein	AR
Chishao	MOL000449	Stigmasterol	ADRB2
Chishao	MOL001002	ellagic acid	CDK2
Chishao	MOL000449	Stigmasterol	ADRA1A
Chishao	MOL000449	Stigmasterol	SLC6A3
Chishao	MOL000449	Stigmasterol	ADRB1
Chishao	MOL000358	beta-sitosterol	CHRNA2
Chishao	MOL002714	baicalein	NCOA2
Chishao	MOL000358	beta-sitosterol	SCN5A
Chishao	MOL000449	Stigmasterol	SLC6A2
Chishao	MOL004355	Spinasterol	NCOA2
Chishao	MOL000449	Stigmasterol	SCN5A
Chishao	MOL002714	baicalein	PCP4
Chishao	MOL000449	Stigmasterol	CTRB1
Chishao	MOL000358	beta-sitosterol	DRD1
Chishao	MOL002714	baicalein	DPP4
Chishao	MOL000358	beta-sitosterol	OPRM1
Chishao	MOL000492	(+)-catechin	DPEP1
Chishao	MOL002883	Ethyl oleate (NF)	NCOA2
Chishao	MOL002714	baicalein	NCOA1
Chishao	MOL000358	beta-sitosterol	ADRA1A
Chishao	MOL000358	beta-sitosterol	ADRA1B
Chishao	MOL000492	(+)-catechin	NCOA2
Chishao	MOL000449	Stigmasterol	ADRA2A
Chishao	MOL000359	sitosterol	NCOA2
Chishao	MOL000358	beta-sitosterol	NCOA2
Chishao	MOL000449	Stigmasterol	NCOA2
Chishao	MOL000492	(+)-catechin	PCP4
Chuanxiong	MOL001494	Mandenol	PTGS1
Chuanxiong	MOL001494	Mandenol	PTGS2
Chuanxiong	MOL001494	Mandenol	NCOA2
Chuanxiong	MOL002135	Myricanone	NOS2
Chuanxiong	MOL002135	Myricanone	PTGS1
Chuanxiong	MOL002135	Myricanone	KCNH2
Chuanxiong	MOL002135	Myricanone	ESR1
Chuanxiong	MOL002135	Myricanone	AR
Chuanxiong	MOL002135	Myricanone	SCN5A
Chuanxiong	MOL002135	Myricanone	PPARG
Chuanxiong	MOL002135	Myricanone	PTGS2
Chuanxiong	MOL002135	Myricanone	F7
Chuanxiong	MOL002135	Myricanone	KDR
Chuanxiong	MOL002135	Myricanone	RXRA
Chuanxiong	MOL002135	Myricanone	ADRB2
Chuanxiong	MOL002135	Myricanone	ESR2
Chuanxiong	MOL002135	Myricanone	DPP4
Chuanxiong	MOL002135	Myricanone	MAPK14
Chuanxiong	MOL002135	Myricanone	GSK3B
Chuanxiong	MOL002135	Myricanone	HSP90AB1
Chuanxiong	MOL002135	Myricanone	CDK2
Chuanxiong	MOL002135	Myricanone	CHEK1
Chuanxiong	MOL002135	Myricanone	IGHG1
Chuanxiong	MOL002135	Myricanone	CCNA2
Chuanxiong	MOL002135	Myricanone	NCOA1
Chuanxiong	MOL002140	Perlolyrine	PTGS2
Chuanxiong	MOL002140	Perlolyrine	RXRA
Chuanxiong	MOL002157	wallichilide	PTGS2
Chuanxiong	MOL002157	wallichilide	NR3C2
Chuanxiong	MOL002157	wallichilide	NR3C1
Chuanxiong	MOL002157	wallichilide	NCOA2
Chuanxiong	MOL000359	sitosterol	PGR
Chuanxiong	MOL000359	sitosterol	NCOA2
Chuanxiong	MOL000359	sitosterol	NR3C2
Chuanxiong	MOL000433	FA	CDK2
Chuanxiong	MOL000433	FA	GSK3B
Danggui	MOL000358	beta-sitosterol	PGR
Danggui	MOL000358	beta-sitosterol	NCOA2
Danggui	MOL000358	beta-sitosterol	PTGS1
Danggui	MOL000358	beta-sitosterol	PTGS2
Danggui	MOL000358	beta-sitosterol	HSP90AB1
Danggui	MOL000358	beta-sitosterol	KCNH2
Danggui	MOL000358	beta-sitosterol	DRD1
Danggui	MOL000358	beta-sitosterol	CHRM3
Danggui	MOL000358	beta-sitosterol	CHRM1
Danggui	MOL000358	beta-sitosterol	SCN5A
Danggui	MOL000358	beta-sitosterol	CHRM4
Danggui	MOL000358	beta-sitosterol	ADRA1A
Danggui	MOL000358	beta-sitosterol	CHRM2
Danggui	MOL000358	beta-sitosterol	ADRA1B
Danggui	MOL000358	beta-sitosterol	ADRB2
Danggui	MOL000358	beta-sitosterol	CHRNA2
Danggui	MOL000358	beta-sitosterol	SLC6A4
Danggui	MOL000358	beta-sitosterol	OPRM1
Danggui	MOL000358	beta-sitosterol	GABRA1
Danggui	MOL000358	beta-sitosterol	BCL2
Danggui	MOL000358	beta-sitosterol	BAX
Danggui	MOL000358	beta-sitosterol	CASP9
Danggui	MOL000358	beta-sitosterol	JUN
Danggui	MOL000358	beta-sitosterol	CASP3
Danggui	MOL000358	beta-sitosterol	CASP8
Danggui	MOL000358	beta-sitosterol	PRKCA
Danggui	MOL000358	beta-sitosterol	PON1
Danggui	MOL000358	beta-sitosterol	MAP2
Danggui	MOL000449	Stigmasterol	PGR
Danggui	MOL000449	Stigmasterol	NR3C2
Danggui	MOL000449	Stigmasterol	NCOA2
Danggui	MOL000449	Stigmasterol	ADH1C
Danggui	MOL000449	Stigmasterol	IGHG1
Danggui	MOL000449	Stigmasterol	RXRA
Danggui	MOL000449	Stigmasterol	NCOA1
Danggui	MOL000449	Stigmasterol	PTGS1
Danggui	MOL000449	Stigmasterol	PTGS2
Danggui	MOL000449	Stigmasterol	ADRA2A
Danggui	MOL000449	Stigmasterol	SLC6A2
Danggui	MOL000449	Stigmasterol	SLC6A3
Danggui	MOL000449	Stigmasterol	ADRB2
Danggui	MOL000449	Stigmasterol	AKR1B1
Danggui	MOL000449	Stigmasterol	PLAU
Danggui	MOL000449	Stigmasterol	LTA4H
Danggui	MOL000449	Stigmasterol	MAOB
Danggui	MOL000449	Stigmasterol	MAOA
Danggui	MOL000449	Stigmasterol	CTRB1
Danggui	MOL000449	Stigmasterol	CHRM3
Danggui	MOL000449	Stigmasterol	CHRM1
Danggui	MOL000449	Stigmasterol	ADRB1
Danggui	MOL000449	Stigmasterol	SCN5A
Danggui	MOL000449	Stigmasterol	ADRA1A
Danggui	MOL000449	Stigmasterol	CHRM2
Danggui	MOL000449	Stigmasterol	ADRA1B
Danggui	MOL000449	Stigmasterol	GABRA1
Honghua	MOL001771	poriferast-5-en-3beta-ol	PGR
Honghua	MOL001771	poriferast-5-en-3beta-ol	NCOA2
Honghua	MOL002694	4-[(E)-4-(3,5-dimethoxy-4-oxo-1-cyclohexa-2,5-dienylidene)but-2-enylidene]-2,6-dimethoxycyclohexa-2,5-dien-1-one	PTGS2
Honghua	MOL002694	4-[(E)-4-(3,5-dimethoxy-4-oxo-1-cyclohexa-2,5-dienylidene)but-2-enylidene]-2,6-dimethoxycyclohexa-2,5-dien-1-one	NCOA2
Honghua	MOL002695	lignan	ESR1
Honghua	MOL002695	lignan	PTGS2
Honghua	MOL002695	lignan	CA2
Honghua	MOL002695	lignan	NCOA2
Honghua	MOL002695	lignan	PCP4
Honghua	MOL002710	Pyrethrin II	PTGS2
Honghua	MOL002710	Pyrethrin II	NCOA2
Honghua	MOL002712	6-Hydroxykaempferol	NOS2
Honghua	MOL002712	6-Hydroxykaempferol	PTGS1
Honghua	MOL002712	6-Hydroxykaempferol	AR
Honghua	MOL002712	6-Hydroxykaempferol	PPARG
Honghua	MOL002712	6-Hydroxykaempferol	PTGS2
Honghua	MOL002712	6-Hydroxykaempferol	HSP90AB1
Honghua	MOL002712	6-Hydroxykaempferol	PRSS1
Honghua	MOL002712	6-Hydroxykaempferol	NCOA2
Honghua	MOL002712	6-Hydroxykaempferol	DPP4
Honghua	MOL002714	baicalein	PTGS1
Honghua	MOL002714	baicalein	AR
Honghua	MOL002714	baicalein	PTGS2
Honghua	MOL002714	baicalein	HSP90AB1
Honghua	MOL002714	baicalein	DPP4
Honghua	MOL002714	baicalein	PRSS1
Honghua	MOL002714	baicalein	NCOA2
Honghua	MOL002714	baicalein	NCOA1
Honghua	MOL002714	baicalein	PCP4
Honghua	MOL002714	baicalein	RELA
Honghua	MOL002714	baicalein	AKT1
Honghua	MOL002714	baicalein	VEGFA
Honghua	MOL002714	baicalein	BCL2
Honghua	MOL002714	baicalein	FOS
Honghua	MOL002714	baicalein	BAX
Honghua	MOL002714	baicalein	MMP9
Honghua	MOL002714	baicalein	CASP3
Honghua	MOL002714	baicalein	TP53
Honghua	MOL002714	baicalein	HIF1A
Honghua	MOL002714	baicalein	FOSL1
Honghua	MOL002714	baicalein	FOSL2
Honghua	MOL002714	baicalein	CDK1
Honghua	MOL002714	baicalein	CCNB1
Honghua	MOL002714	baicalein	MPO
Honghua	MOL002714	baicalein	AHR
Honghua	MOL002714	baicalein	IGF2
Honghua	MOL002714	baicalein	CYCS
Honghua	MOL002714	baicalein	NFATC1
Honghua	MOL002714	baicalein	TDRD7
Honghua	MOL002714	baicalein	EGLN1
Honghua	MOL002714	baicalein	NOX5
Honghua	MOL002714	baicalein	FABP5
Honghua	MOL002714	baicalein	APOD
Honghua	MOL002717	qt_carthamone	PTGS1
Honghua	MOL002717	qt_carthamone	PTGS2
Honghua	MOL002717	qt_carthamone	HSP90AB1
Honghua	MOL002721	quercetagetin	AR
Honghua	MOL002721	quercetagetin	PPARG
Honghua	MOL002721	quercetagetin	PTGS2
Honghua	MOL002721	quercetagetin	HSP90AB1
Honghua	MOL002721	quercetagetin	DPP4
Honghua	MOL002721	quercetagetin	PRSS1
Honghua	MOL002757	7,8-dimethyl-1H-pyrimido[5,6-g]quinoxaline-2,4-dione	PTGS1
Honghua	MOL002757	7,8-dimethyl-1H-pyrimido[5,6-g]quinoxaline-2,4-dione	PTGS2
Honghua	MOL002757	7,8-dimethyl-1H-pyrimido[5,6-g]quinoxaline-2,4-dione	GABRA1
Honghua	MOL002757	7,8-dimethyl-1H-pyrimido[5,6-g]quinoxaline-2,4-dione	HSP90AB1
Honghua	MOL002773	beta-carotene	AKT1
Honghua	MOL002773	beta-carotene	VEGFA
Honghua	MOL002773	beta-carotene	BCL2
Honghua	MOL002773	beta-carotene	CASP9
Honghua	MOL002773	beta-carotene	MMP2
Honghua	MOL002773	beta-carotene	JUN
Honghua	MOL002773	beta-carotene	CASP3
Honghua	MOL002773	beta-carotene	PTGS2
Honghua	MOL002773	beta-carotene	CASP8
Honghua	MOL002773	beta-carotene	MMP1
Honghua	MOL002773	beta-carotene	HMOX1
Honghua	MOL002773	beta-carotene	CYP3A4
Honghua	MOL002773	beta-carotene	CYP1A2
Honghua	MOL002773	beta-carotene	CAV1
Honghua	MOL002773	beta-carotene	CTNNB1
Honghua	MOL002773	beta-carotene	MYC
Honghua	MOL002773	beta-carotene	CASP7
Honghua	MOL002773	beta-carotene	F3
Honghua	MOL002773	beta-carotene	GJA1
Honghua	MOL002773	beta-carotene	MMP10
Honghua	MOL000358	beta-sitosterol	PGR
Honghua	MOL000358	beta-sitosterol	NCOA2
Honghua	MOL000358	beta-sitosterol	PTGS1
Honghua	MOL000358	beta-sitosterol	PTGS2
Honghua	MOL000358	beta-sitosterol	HSP90AB1
Honghua	MOL000358	beta-sitosterol	KCNH2
Honghua	MOL000358	beta-sitosterol	DRD1
Honghua	MOL000358	beta-sitosterol	CHRM3
Honghua	MOL000358	beta-sitosterol	CHRM1
Honghua	MOL000358	beta-sitosterol	SCN5A
Honghua	MOL000358	beta-sitosterol	CHRM4
Honghua	MOL000358	beta-sitosterol	ADRA1A
Honghua	MOL000358	beta-sitosterol	CHRM2
Honghua	MOL000358	beta-sitosterol	ADRA1B
Honghua	MOL000358	beta-sitosterol	ADRB2
Honghua	MOL000358	beta-sitosterol	CHRNA2
Honghua	MOL000358	beta-sitosterol	SLC6A4
Honghua	MOL000358	beta-sitosterol	OPRM1
Honghua	MOL000358	beta-sitosterol	GABRA1
Honghua	MOL000358	beta-sitosterol	BCL2
Honghua	MOL000358	beta-sitosterol	BAX
Honghua	MOL000358	beta-sitosterol	CASP9
Honghua	MOL000358	beta-sitosterol	JUN
Honghua	MOL000358	beta-sitosterol	CASP3
Honghua	MOL000358	beta-sitosterol	CASP8
Honghua	MOL000358	beta-sitosterol	PRKCA
Honghua	MOL000358	beta-sitosterol	PON1
Honghua	MOL000358	beta-sitosterol	MAP2
Honghua	MOL000422	kaempferol	NOS2
Honghua	MOL000422	kaempferol	PTGS1
Honghua	MOL000422	kaempferol	AR
Honghua	MOL000422	kaempferol	PPARG
Honghua	MOL000422	kaempferol	PTGS2
Honghua	MOL000422	kaempferol	HSP90AB1
Honghua	MOL000422	kaempferol	NCOA2
Honghua	MOL000422	kaempferol	DPP4
Honghua	MOL000422	kaempferol	PRSS1
Honghua	MOL000422	kaempferol	PGR
Honghua	MOL000422	kaempferol	CHRM1
Honghua	MOL000422	kaempferol	ACHE
Honghua	MOL000422	kaempferol	SLC6A2
Honghua	MOL000422	kaempferol	CHRM2
Honghua	MOL000422	kaempferol	ADRA1B
Honghua	MOL000422	kaempferol	GABRA1
Honghua	MOL000422	kaempferol	F7
Honghua	MOL000422	kaempferol	PCP4
Honghua	MOL000422	kaempferol	RELA
Honghua	MOL000422	kaempferol	IKBKB
Honghua	MOL000422	kaempferol	AKT1
Honghua	MOL000422	kaempferol	BCL2
Honghua	MOL000422	kaempferol	BAX
Honghua	MOL000422	kaempferol	TNFAIP6
Honghua	MOL000422	kaempferol	JUN
Honghua	MOL000422	kaempferol	AHSA1
Honghua	MOL000422	kaempferol	CASP3
Honghua	MOL000422	kaempferol	MAPK8
Honghua	MOL000422	kaempferol	MMP1
Honghua	MOL000422	kaempferol	STAT1
Honghua	MOL000422	kaempferol	CDK1
Honghua	MOL000422	kaempferol	PPARG
Honghua	MOL000422	kaempferol	HMOX1
Honghua	MOL000422	kaempferol	CYP3A4
Honghua	MOL000422	kaempferol	CYP1A2
Honghua	MOL000422	kaempferol	CYP1A1
Honghua	MOL000422	kaempferol	ICAM1
Honghua	MOL000422	kaempferol	SELE
Honghua	MOL000422	kaempferol	VCAM1
Honghua	MOL000422	kaempferol	NR1I2
Honghua	MOL000422	kaempferol	CYP1B1
Honghua	MOL000422	kaempferol	ALOX5
Honghua	MOL000422	kaempferol	HAS2
Honghua	MOL000422	kaempferol	GSTP1
Honghua	MOL000422	kaempferol	AHR
Honghua	MOL000422	kaempferol	PSMD3
Honghua	MOL000422	kaempferol	SLC2A4
Honghua	MOL000422	kaempferol	NR1I3
Honghua	MOL000422	kaempferol	INSRR
Honghua	MOL000422	kaempferol	DIO1
Honghua	MOL000422	kaempferol	PPP3CA
Honghua	MOL000422	kaempferol	GSTM1
Honghua	MOL000422	kaempferol	GSTM2
Honghua	MOL000422	kaempferol	AKR1C3
Honghua	MOL000422	kaempferol	SLPI
Honghua	MOL000449	Stigmasterol	PGR
Honghua	MOL000449	Stigmasterol	NR3C2
Honghua	MOL000449	Stigmasterol	NCOA2
Honghua	MOL000449	Stigmasterol	ADH1C
Honghua	MOL000449	Stigmasterol	IGHG1
Honghua	MOL000449	Stigmasterol	RXRA
Honghua	MOL000449	Stigmasterol	NCOA1
Honghua	MOL000449	Stigmasterol	PTGS1
Honghua	MOL000449	Stigmasterol	PTGS2
Honghua	MOL000449	Stigmasterol	ADRA2A
Honghua	MOL000449	Stigmasterol	SLC6A2
Honghua	MOL000449	Stigmasterol	SLC6A3
Honghua	MOL000449	Stigmasterol	ADRB2
Honghua	MOL000449	Stigmasterol	AKR1B1
Honghua	MOL000449	Stigmasterol	PLAU
Honghua	MOL000449	Stigmasterol	LTA4H
Honghua	MOL000449	Stigmasterol	MAOB
Honghua	MOL000449	Stigmasterol	MAOA
Honghua	MOL000449	Stigmasterol	CTRB1
Honghua	MOL000449	Stigmasterol	CHRM3
Honghua	MOL000449	Stigmasterol	CHRM1
Honghua	MOL000449	Stigmasterol	ADRB1
Honghua	MOL000449	Stigmasterol	SCN5A
Honghua	MOL000449	Stigmasterol	ADRA1A
Honghua	MOL000449	Stigmasterol	CHRM2
Honghua	MOL000449	Stigmasterol	ADRA1B
Honghua	MOL000449	Stigmasterol	GABRA1
Honghua	MOL000006	luteolin	PTGS1
Honghua	MOL000006	luteolin	AR
Honghua	MOL000006	luteolin	PTGS2
Honghua	MOL000006	luteolin	HSP90AB1
Honghua	MOL000006	luteolin	PRSS1
Honghua	MOL000006	luteolin	NCOA2
Honghua	MOL000006	luteolin	DPP4
Honghua	MOL000006	luteolin	RELA
Honghua	MOL000006	luteolin	EGFR
Honghua	MOL000006	luteolin	AKT1
Honghua	MOL000006	luteolin	VEGFA
Honghua	MOL000006	luteolin	CCND1
Honghua	MOL000006	luteolin	BCL2L1
Honghua	MOL000006	luteolin	CDKN1A
Honghua	MOL000006	luteolin	CASP9
Honghua	MOL000006	luteolin	MMP2
Honghua	MOL000006	luteolin	MMP9
Honghua	MOL000006	luteolin	MAPK1
Honghua	MOL000006	luteolin	IL10RA
Honghua	MOL000006	luteolin	RB1
Honghua	MOL000006	luteolin	CDK4
Honghua	MOL000006	luteolin	TNFAIP6
Honghua	MOL000006	luteolin	JUN
Honghua	MOL000006	luteolin	IL6R
Honghua	MOL000006	luteolin	CASP3
Honghua	MOL000006	luteolin	TP53
Honghua	MOL000006	luteolin	NFKBIA
Honghua	MOL000006	luteolin	TOP1
Honghua	MOL000006	luteolin	MDM2
Honghua	MOL000006	luteolin	APP
Honghua	MOL000006	luteolin	MMP1
Honghua	MOL000006	luteolin	PCNA
Honghua	MOL000006	luteolin	ERBB2
Honghua	MOL000006	luteolin	PPARG
Honghua	MOL000006	luteolin	HMOX1
Honghua	MOL000006	luteolin	CASP7
Honghua	MOL000006	luteolin	ICAM1
Honghua	MOL000006	luteolin	MCL1
Honghua	MOL000006	luteolin	BIRC5
Honghua	MOL000006	luteolin	IL2RA
Honghua	MOL000006	luteolin	CCNB1
Honghua	MOL000006	luteolin	TYR
Honghua	MOL000006	luteolin	IFNG
Honghua	MOL000006	luteolin	IL4
Honghua	MOL000006	luteolin	TOP2A
Honghua	MOL000006	luteolin	GSTP1
Honghua	MOL000006	luteolin	XIAP
Honghua	MOL000006	luteolin	SLC2A4
Honghua	MOL000006	luteolin	INSRR
Honghua	MOL000006	luteolin	CD40LG
Honghua	MOL000006	luteolin	PTGES
Honghua	MOL000006	luteolin	NUF2
Honghua	MOL000006	luteolin	ADCY2
Honghua	MOL000006	luteolin	MET
Honghua	MOL000953	CLR	PGR
Honghua	MOL000953	CLR	NR3C2
Honghua	MOL000953	CLR	NCOA2
Honghua	MOL000098	quercetin	PTGS1
Honghua	MOL000098	quercetin	AR
Honghua	MOL000098	quercetin	PPARG
Honghua	MOL000098	quercetin	PTGS2
Honghua	MOL000098	quercetin	HSP90AB1
Honghua	MOL000098	quercetin	NCOA2
Honghua	MOL000098	quercetin	DPP4
Honghua	MOL000098	quercetin	AKR1B1
Honghua	MOL000098	quercetin	PRSS1
Honghua	MOL000098	quercetin	KCNH2
Honghua	MOL000098	quercetin	SCN5A
Honghua	MOL000098	quercetin	ADRB2
Honghua	MOL000098	quercetin	MMP3
Honghua	MOL000098	quercetin	F7
Honghua	MOL000098	quercetin	RXRA
Honghua	MOL000098	quercetin	ACHE
Honghua	MOL000098	quercetin	GABRA1
Honghua	MOL000098	quercetin	MAOB
Honghua	MOL000098	quercetin	RELA
Honghua	MOL000098	quercetin	EGFR
Honghua	MOL000098	quercetin	AKT1
Honghua	MOL000098	quercetin	VEGFA
Honghua	MOL000098	quercetin	CCND1
Honghua	MOL000098	quercetin	BCL2
Honghua	MOL000098	quercetin	BCL2L1
Honghua	MOL000098	quercetin	FOS
Honghua	MOL000098	quercetin	CDKN1A
Honghua	MOL000098	quercetin	EIF6
Honghua	MOL000098	quercetin	BAX
Honghua	MOL000098	quercetin	CASP9
Honghua	MOL000098	quercetin	PLAU
Honghua	MOL000098	quercetin	MMP2
Honghua	MOL000098	quercetin	MMP9
Honghua	MOL000098	quercetin	MAPK1
Honghua	MOL000098	quercetin	IL10RA
Honghua	MOL000098	quercetin	EGF
Honghua	MOL000098	quercetin	RB1
Honghua	MOL000098	quercetin	TNFAIP6
Honghua	MOL000098	quercetin	JUN
Honghua	MOL000098	quercetin	IL6R
Honghua	MOL000098	quercetin	AHSA1
Honghua	MOL000098	quercetin	CASP3
Honghua	MOL000098	quercetin	TP53
Honghua	MOL000098	quercetin	ELK1
Honghua	MOL000098	quercetin	NFKBIA
Honghua	MOL000098	quercetin	POR
Honghua	MOL000098	quercetin	ODC1
Honghua	MOL000098	quercetin	CASP8
Honghua	MOL000098	quercetin	TOP1
Honghua	MOL000098	quercetin	RAF1
Honghua	MOL000098	quercetin	SOD1
Honghua	MOL000098	quercetin	PRKCA
Honghua	MOL000098	quercetin	MMP1
Honghua	MOL000098	quercetin	HIF1A
Honghua	MOL000098	quercetin	STAT1
Honghua	MOL000098	quercetin	RUNX1T1
Honghua	MOL000098	quercetin	CDK1
Honghua	MOL000098	quercetin	HSPA5
Honghua	MOL000098	quercetin	ERBB2
Honghua	MOL000098	quercetin	PPARG
Honghua	MOL000098	quercetin	ACACA
Honghua	MOL000098	quercetin	HMOX1
Honghua	MOL000098	quercetin	CYP3A4
Honghua	MOL000098	quercetin	CYP1A2
Honghua	MOL000098	quercetin	CAV1
Honghua	MOL000098	quercetin	MYC
Honghua	MOL000098	quercetin	F3
Honghua	MOL000098	quercetin	GJA1
Honghua	MOL000098	quercetin	CYP1A1
Honghua	MOL000098	quercetin	ICAM1
Honghua	MOL000098	quercetin	IL1B
Honghua	MOL000098	quercetin	CCL2
Honghua	MOL000098	quercetin	SELE
Honghua	MOL000098	quercetin	VCAM1
Honghua	MOL000098	quercetin	PTGER3
Honghua	MOL000098	quercetin	CXCL8
Honghua	MOL000098	quercetin	PRKCB
Honghua	MOL000098	quercetin	BIRC5
Honghua	MOL000098	quercetin	DUOX2
Honghua	MOL000098	quercetin	NOS3
Honghua	MOL000098	quercetin	HSPB1
Honghua	MOL000098	quercetin	SULT1E1
Honghua	MOL000098	quercetin	IL2RA
Honghua	MOL000098	quercetin	NR1I2
Honghua	MOL000098	quercetin	CYP1B1
Honghua	MOL000098	quercetin	CCNB1
Honghua	MOL000098	quercetin	PLAT
Honghua	MOL000098	quercetin	THBD
Honghua	MOL000098	quercetin	SERPINE1
Honghua	MOL000098	quercetin	COL1A1
Honghua	MOL000098	quercetin	IFNG
Honghua	MOL000098	quercetin	ALOX5
Honghua	MOL000098	quercetin	IL1A
Honghua	MOL000098	quercetin	MPO
Honghua	MOL000098	quercetin	TOP2A
Honghua	MOL000098	quercetin	NCF1
Honghua	MOL000098	quercetin	ABCG2
Honghua	MOL000098	quercetin	HAS2
Honghua	MOL000098	quercetin	GSTP1
Honghua	MOL000098	quercetin	NFE2L2
Honghua	MOL000098	quercetin	NQO1
Honghua	MOL000098	quercetin	PARP1
Honghua	MOL000098	quercetin	AHR
Honghua	MOL000098	quercetin	PSMD3
Honghua	MOL000098	quercetin	SLC2A4
Honghua	MOL000098	quercetin	COL3A1
Honghua	MOL000098	quercetin	CXCL11
Honghua	MOL000098	quercetin	CXCL2
Honghua	MOL000098	quercetin	DCAF5
Honghua	MOL000098	quercetin	NR1I3
Honghua	MOL000098	quercetin	CHEK2
Honghua	MOL000098	quercetin	INSRR
Honghua	MOL000098	quercetin	CLDN4
Honghua	MOL000098	quercetin	PPARA
Honghua	MOL000098	quercetin	PPARD
Honghua	MOL000098	quercetin	HSF1
Honghua	MOL000098	quercetin	CXCL10
Honghua	MOL000098	quercetin	CHUK
Honghua	MOL000098	quercetin	SPP1
Honghua	MOL000098	quercetin	RUNX2
Honghua	MOL000098	quercetin	RASSF1
Honghua	MOL000098	quercetin	E2F1
Honghua	MOL000098	quercetin	E2F2
Honghua	MOL000098	quercetin	ACP3
Honghua	MOL000098	quercetin	CTSD
Honghua	MOL000098	quercetin	IGFBP3
Honghua	MOL000098	quercetin	IGF2
Honghua	MOL000098	quercetin	CD40LG
Honghua	MOL000098	quercetin	IRF1
Honghua	MOL000098	quercetin	ERBB3
Honghua	MOL000098	quercetin	PON1
Honghua	MOL000098	quercetin	DIO1
Honghua	MOL000098	quercetin	PCOLCE
Honghua	MOL000098	quercetin	NPEPPS
Honghua	MOL000098	quercetin	HK2
Honghua	MOL000098	quercetin	RASA1
Honghua	MOL000098	quercetin	GSTM1
Honghua	MOL000098	quercetin	GSTM2
Shudihuang	MOL000359	sitosterol	PGR
Shudihuang	MOL000359	sitosterol	NCOA2
Shudihuang	MOL000359	sitosterol	NR3C2
Shudihuang	MOL000449	Stigmasterol	PGR
Shudihuang	MOL000449	Stigmasterol	NR3C2
Shudihuang	MOL000449	Stigmasterol	NCOA2
Shudihuang	MOL000449	Stigmasterol	ADH1C
Shudihuang	MOL000449	Stigmasterol	IGHG1
Shudihuang	MOL000449	Stigmasterol	RXRA
Shudihuang	MOL000449	Stigmasterol	NCOA1
Shudihuang	MOL000449	Stigmasterol	PTGS1
Shudihuang	MOL000449	Stigmasterol	PTGS2
Shudihuang	MOL000449	Stigmasterol	ADRA2A
Shudihuang	MOL000449	Stigmasterol	SLC6A2
Shudihuang	MOL000449	Stigmasterol	SLC6A3
Shudihuang	MOL000449	Stigmasterol	ADRB2
Shudihuang	MOL000449	Stigmasterol	AKR1B1
Shudihuang	MOL000449	Stigmasterol	PLAU
Shudihuang	MOL000449	Stigmasterol	LTA4H
Shudihuang	MOL000449	Stigmasterol	MAOB
Shudihuang	MOL000449	Stigmasterol	MAOA
Shudihuang	MOL000449	Stigmasterol	CTRB1
Shudihuang	MOL000449	Stigmasterol	CHRM3
Shudihuang	MOL000449	Stigmasterol	CHRM1
Shudihuang	MOL000449	Stigmasterol	ADRB1
Shudihuang	MOL000449	Stigmasterol	SCN5A
Shudihuang	MOL000449	Stigmasterol	ADRA1A
Shudihuang	MOL000449	Stigmasterol	CHRM2
Shudihuang	MOL000449	Stigmasterol	ADRA1B
Shudihuang	MOL000449	Stigmasterol	GABRA1
Taoren	MOL001323	Sitosterol alpha1	PGR
Taoren	MOL001323	Sitosterol alpha1	PTGS2
Taoren	MOL001323	Sitosterol alpha1	GABRA1
Taoren	MOL001323	Sitosterol alpha1	ADH1C
Taoren	MOL001323	Sitosterol alpha1	NR3C2
Taoren	MOL001328	2,3-didehydro GA70	PTGS1
Taoren	MOL001328	2,3-didehydro GA70	CHRM1
Taoren	MOL001328	2,3-didehydro GA70	PTGS2
Taoren	MOL001328	2,3-didehydro GA70	SLC6A2
Taoren	MOL001328	2,3-didehydro GA70	GABRA1
Taoren	MOL001328	2,3-didehydro GA70	PRSS1
Taoren	MOL001328	2,3-didehydro GA70	GRIA2
Taoren	MOL001329	2,3-didehydro GA77	PTGS2
Taoren	MOL001329	2,3-didehydro GA77	CA2
Taoren	MOL001329	2,3-didehydro GA77	GABRA1
Taoren	MOL001329	2,3-didehydro GA77	NCOA2
Taoren	MOL001340	GA120	CHRM3
Taoren	MOL001340	GA120	CHRM1
Taoren	MOL001340	GA120	PTGS2
Taoren	MOL001340	GA120	CHRM2
Taoren	MOL001340	GA120	GABRA1
Taoren	MOL001342	GA121-isolactone	PGR
Taoren	MOL001344	GA122-isolactone	PGR
Taoren	MOL001349	4a-formyl-7alpha-hydroxy-1-methyl-8-methylidene-4aalpha,4bbeta-gibbane-1alpha,10beta-dicarboxylic acid	NR3C2
Taoren	MOL001349	4a-formyl-7alpha-hydroxy-1-methyl-8-methylidene-4aalpha,4bbeta-gibbane-1alpha,10beta-dicarboxylic acid	PGR
Taoren	MOL001351	Gibberellin A44	NR3C2
Taoren	MOL001351	Gibberellin A44	GABRA1
Taoren	MOL001352	GA54	PTGS2
Taoren	MOL001352	GA54	HSP90AB1
Taoren	MOL001352	GA54	NCOA2
Taoren	MOL001352	GA54	PCP4
Taoren	MOL001353	GA60	CHRM2
Taoren	MOL001353	GA60	GABRA1
Taoren	MOL001353	GA60	GRIA2
Taoren	MOL001355	GA63	PTGS2
Taoren	MOL001355	GA63	GABRA1
Taoren	MOL001355	GA63	GRIA2
Taoren	MOL001358	gibberellin 7	CHRM3
Taoren	MOL001358	gibberellin 7	CHRM1
Taoren	MOL001358	gibberellin 7	PTGS2
Taoren	MOL001358	gibberellin 7	SLC6A3
Taoren	MOL001358	gibberellin 7	ADRB2
Taoren	MOL001358	gibberellin 7	SLC6A4
Taoren	MOL001360	GA77	GABRA1
Taoren	MOL001360	GA77	GRIA2
Taoren	MOL001361	GA87	PTGS2
Taoren	MOL001361	GA87	CA2
Taoren	MOL001368	3-O-p-coumaroylquinic acid	PTGS1
Taoren	MOL001368	3-O-p-coumaroylquinic acid	PTGS2
Taoren	MOL001368	3-O-p-coumaroylquinic acid	HSP90AB1
Taoren	MOL001368	3-O-p-coumaroylquinic acid	NCOA2
Taoren	MOL001368	3-O-p-coumaroylquinic acid	PCP4
Taoren	MOL000296	hederagenin	PGR
Taoren	MOL000296	hederagenin	NCOA2
Taoren	MOL000296	hederagenin	CHRM3
Taoren	MOL000296	hederagenin	CHRM1
Taoren	MOL000296	hederagenin	CHRM2
Taoren	MOL000296	hederagenin	ADRA1B
Taoren	MOL000296	hederagenin	GABRA1
Taoren	MOL000296	hederagenin	GRIA2
Taoren	MOL000296	hederagenin	IGHG1
Taoren	MOL000296	hederagenin	ADH1B
Taoren	MOL000296	hederagenin	ADH1C
Taoren	MOL000296	hederagenin	LYZ
Taoren	MOL000296	hederagenin	PTGS1
Taoren	MOL000296	hederagenin	SCN5A
Taoren	MOL000296	hederagenin	PTGS2
Taoren	MOL000296	hederagenin	RXRA
Taoren	MOL000296	hederagenin	SLC6A2
Taoren	MOL000358	beta-sitosterol	PGR
Taoren	MOL000358	beta-sitosterol	NCOA2
Taoren	MOL000358	beta-sitosterol	PTGS1
Taoren	MOL000358	beta-sitosterol	PTGS2
Taoren	MOL000358	beta-sitosterol	HSP90AB1
Taoren	MOL000358	beta-sitosterol	KCNH2
Taoren	MOL000358	beta-sitosterol	DRD1
Taoren	MOL000358	beta-sitosterol	CHRM3
Taoren	MOL000358	beta-sitosterol	CHRM1
Taoren	MOL000358	beta-sitosterol	SCN5A
Taoren	MOL000358	beta-sitosterol	CHRM4
Taoren	MOL000358	beta-sitosterol	ADRA1A
Taoren	MOL000358	beta-sitosterol	CHRM2
Taoren	MOL000358	beta-sitosterol	ADRA1B
Taoren	MOL000358	beta-sitosterol	ADRB2
Taoren	MOL000358	beta-sitosterol	CHRNA2
Taoren	MOL000358	beta-sitosterol	SLC6A4
Taoren	MOL000358	beta-sitosterol	OPRM1
Taoren	MOL000358	beta-sitosterol	GABRA1
Taoren	MOL000358	beta-sitosterol	BCL2
Taoren	MOL000358	beta-sitosterol	BAX
Taoren	MOL000358	beta-sitosterol	CASP9
Taoren	MOL000358	beta-sitosterol	JUN
Taoren	MOL000358	beta-sitosterol	CASP3
Taoren	MOL000358	beta-sitosterol	CASP8
Taoren	MOL000358	beta-sitosterol	PRKCA
Taoren	MOL000358	beta-sitosterol	PON1
Taoren	MOL000358	beta-sitosterol	MAP2
Taoren	MOL000493	campesterol	PGR
Taoren	MOL000493	campesterol	PTGS1
Taoren	MOL000493	campesterol	PTGS2
Taoren	MOL000493	campesterol	HSP90AB1
Taoren	MOL000493	campesterol	NCOA2

## Sheet: Supplementary Table 2
Node	Type	Taoren	Shudihuang	Honghua	Chuanxiong	Danggui	Chishao
MOL002157	Chuanxiong	0	0	0	1	0	0
MOL001328	Taoren	1	0	0	0	0	0
MOL001771	Honghua	0	0	1	0	0	0
MOL000449	multiDrug	0	1	1	0	1	1
MOL002695	Honghua	0	0	1	0	0	0
MOL002721	Honghua	0	0	1	0	0	0
MOL002757	Honghua	0	0	1	0	0	0
MOL001340	Taoren	1	0	0	0	0	0
MOL000493	Taoren	1	0	0	0	0	0
MOL001342	Taoren	1	0	0	0	0	0
MOL002717	Honghua	0	0	1	0	0	0
MOL006992	Chishao	0	0	0	0	0	1
MOL001924	Chishao	0	0	0	0	0	1
MOL001355	Taoren	1	0	0	0	0	0
MOL000358	multiDrug	1	0	1	0	1	1
MOL005043	Chishao	0	0	0	0	0	1
MOL002135	Chuanxiong	0	0	0	1	0	0
MOL001353	Taoren	1	0	0	0	0	0
MOL001344	Taoren	1	0	0	0	0	0
MOL001494	Chuanxiong	0	0	0	1	0	0
MOL002140	Chuanxiong	0	0	0	1	0	0
MOL000296	Taoren	1	0	0	0	0	0
MOL000006	Honghua	0	0	1	0	0	0
MOL002883	Chishao	0	0	0	0	0	1
MOL000359	multiDrug	0	1	0	1	0	1
MOL001368	Taoren	1	0	0	0	0	0
MOL002714	multiDrug	0	0	1	0	0	1
MOL001352	Taoren	1	0	0	0	0	0
MOL000422	Honghua	0	0	1	0	0	0
MOL000433	Chuanxiong	0	0	0	1	0	0
MOL001329	Taoren	1	0	0	0	0	0
MOL001002	Chishao	0	0	0	0	0	1
MOL001323	Taoren	1	0	0	0	0	0
MOL000953	Honghua	0	0	1	0	0	0
MOL001351	Taoren	1	0	0	0	0	0
MOL001918	Chishao	0	0	0	0	0	1
MOL004355	Chishao	0	0	0	0	0	1
MOL001361	Taoren	1	0	0	0	0	0
MOL001360	Taoren	1	0	0	0	0	0
MOL002710	Honghua	0	0	1	0	0	0
MOL000098	Honghua	0	0	1	0	0	0
MOL001358	Taoren	1	0	0	0	0	0
MOL002712	Honghua	0	0	1	0	0	0
MOL000492	Chishao	0	0	0	0	0	1
MOL002694	Honghua	0	0	1	0	0	0
MOL001349	Taoren	1	0	0	0	0	0
MOL006999	Chishao	0	0	0	0	0	1
MOL002773	Honghua	0	0	1	0	0	0
